# Supplementary material
Source: publisher figshare collection journal article supplement (https://gsapubs.figshare.com/ndownloader/files/22745435)

DR2003102

Figure DR1: A: Cracked AuPd coating on starch grain of bean. In high-magnification mode, heating of area led to expansion and blister formation in underlying starch and to crack formation in AuPd coating. B: Enlarged view of blister surface that shows details of crack patterns and margins. Even at this magnification we see no nanoscale spheroidal bodies as part of coating.

**A**

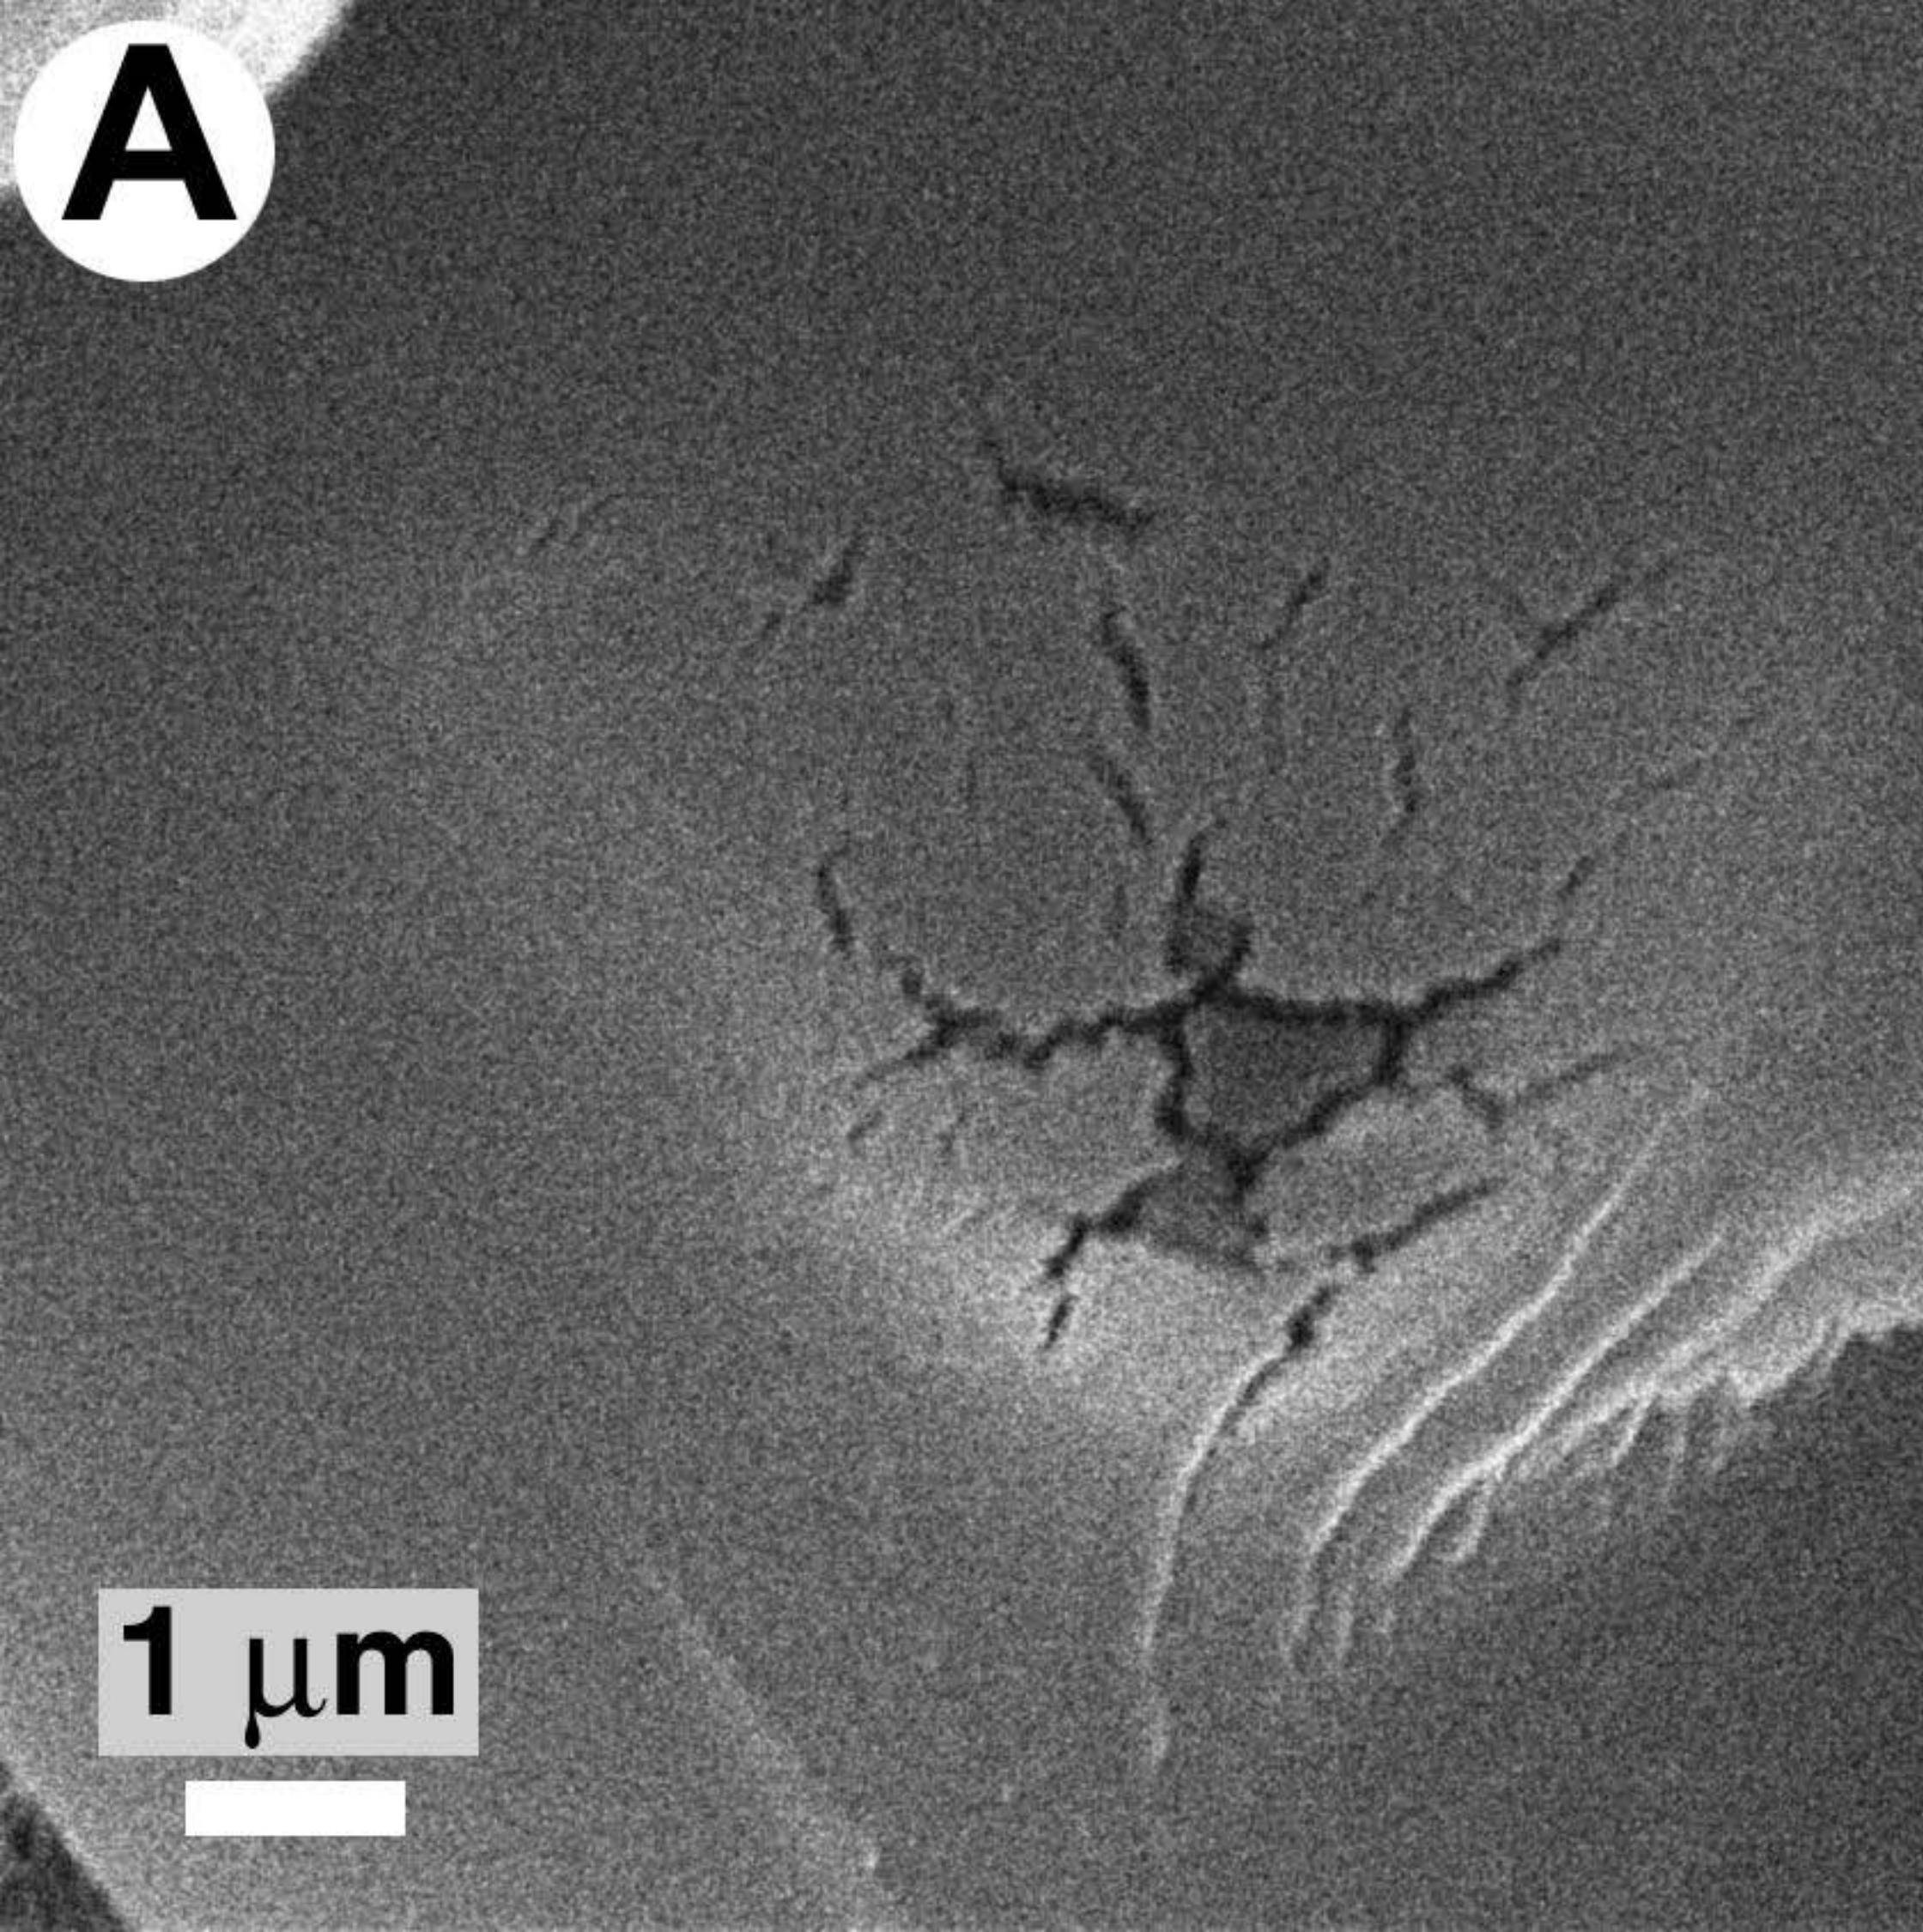

**1  $\mu\text{m}$**

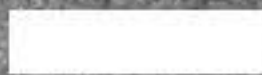

**B**

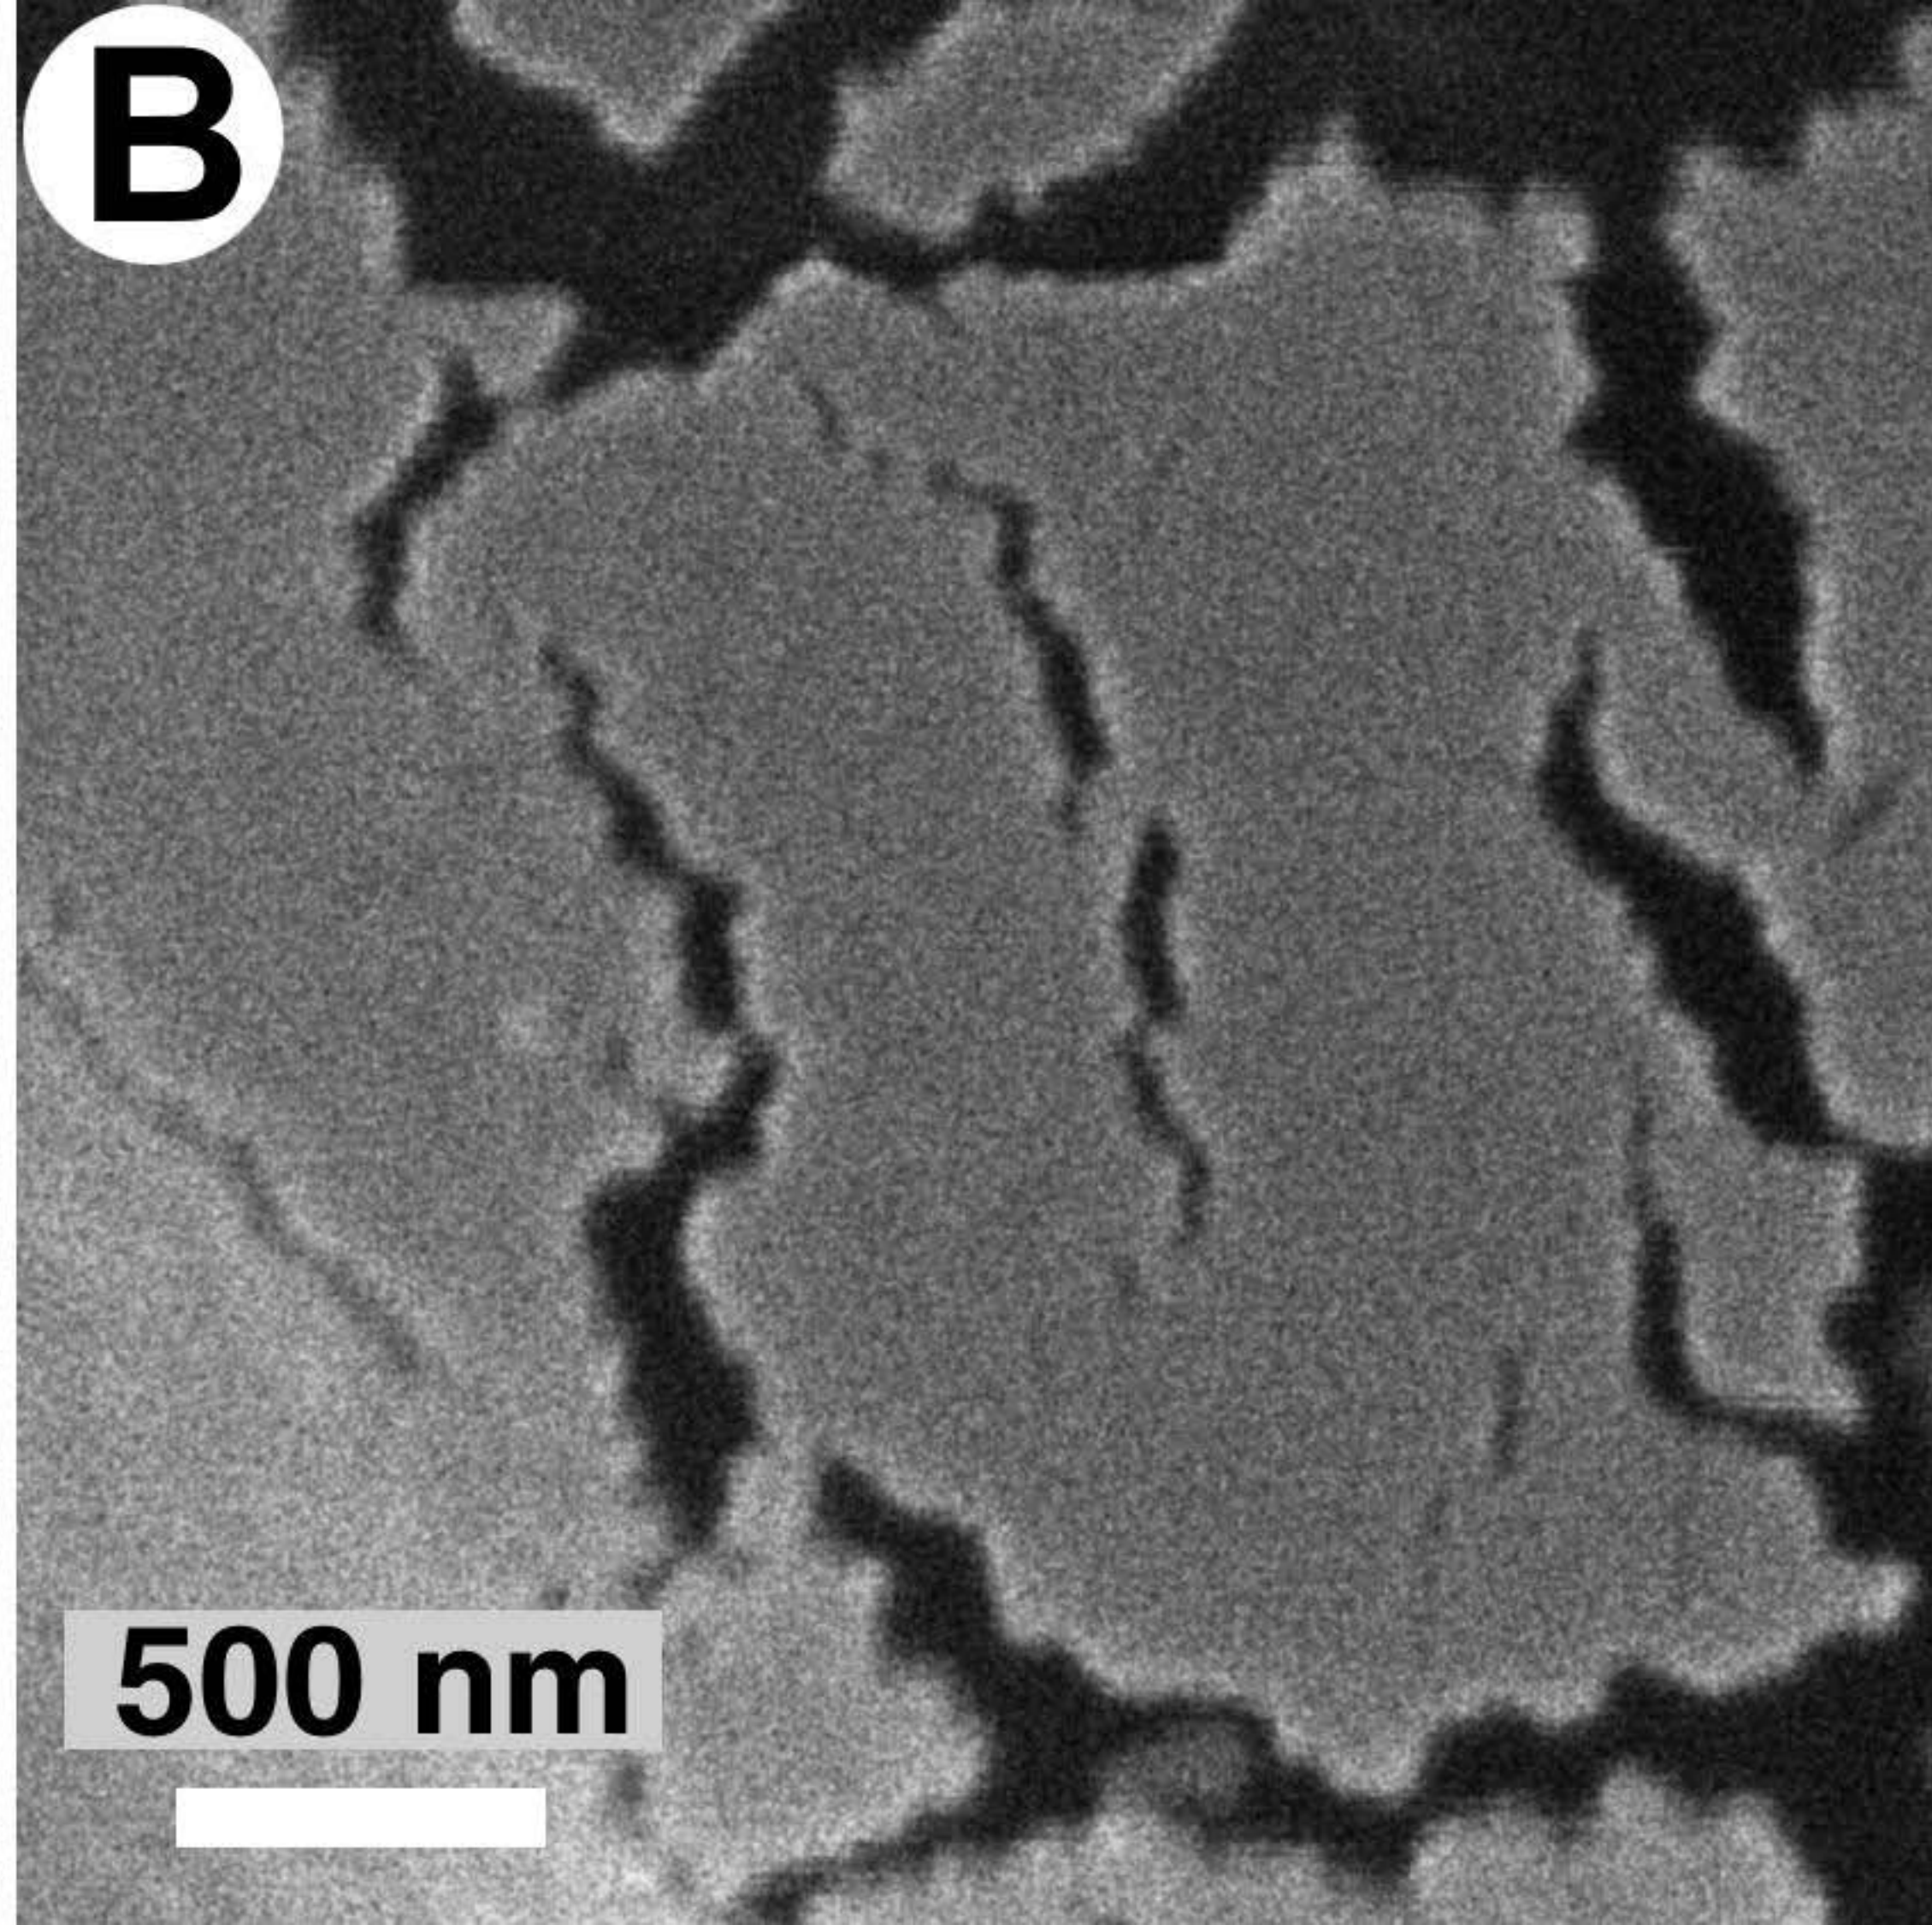

**500 nm**

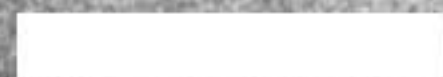

Supplement: Supplementary file 1 [file 22745435]
